# Supplementary material for: Inferring causal metabolic signals that regulate the dynamic TORC1-dependent transcriptome
Source: PubMed Central journal article supplement (PMC4422559; doi:10.15252/msb.20145475), 2015-04-17
Supplement: msb0011-0802-sd1.pdf [file msb0011-0802-sd1.pdf]

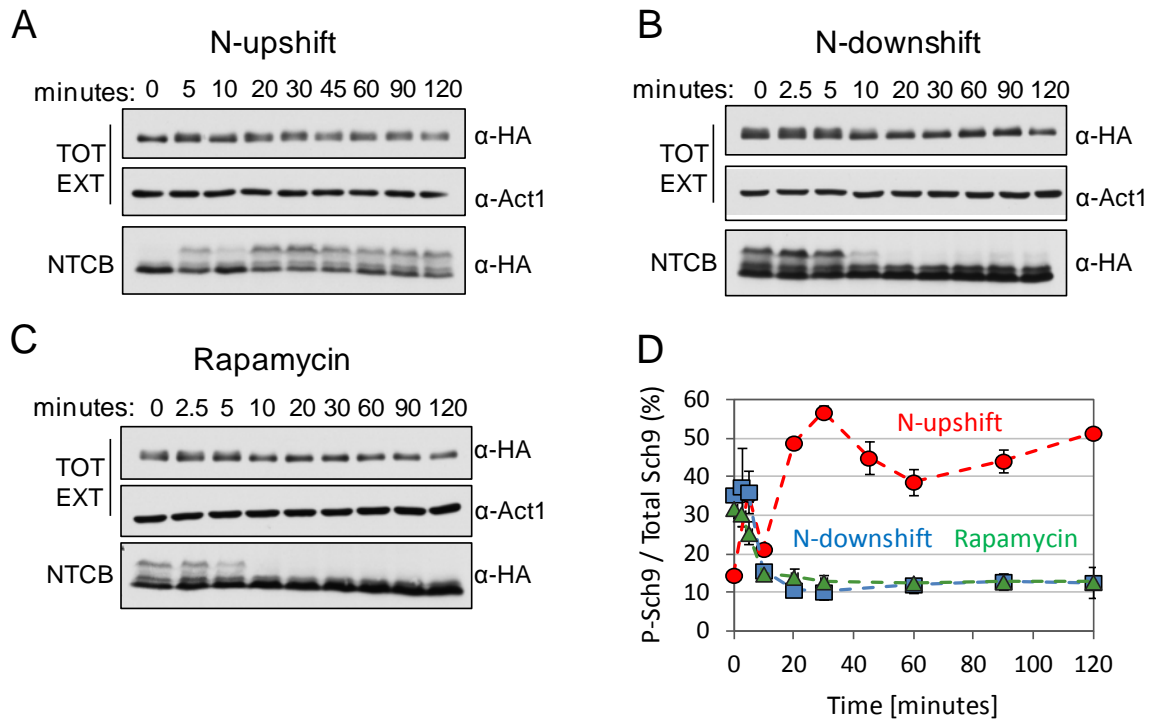

**Supplementary Figure 1. Phosphorylated Sch9 as proxy for TORC1 activity following nutrient up- and downshifts and rapamycin treatment.** The percentage of phosphorylated Sch9 C-terminus was used as a readout of TORC1 activity, as described in **Supplementary Table 3**, with higher Sch9 phosphorylation corresponding to higher TORC1 activity. **A)** Nutrient upshift. **B)** Nutrient downshift. **C)** Rapamycin treatment. **D)** Quantification of Sch9 C-terminus phosphorylation during nutrient shift and rapamycin treatment (relative to panels A, B and C). Values represent the mean of Sch9 phosphorylation percentage  $\pm$  s.d. of three biological independent experiments.
