# Supplementary material for: Inferring causal metabolic signals that regulate the dynamic TORC1-dependent transcriptome
Source: PubMed Central journal article supplement (PMC4422559; doi:10.15252/msb.20145475), 2015-04-17
Supplement: msb0011-0802-sd2.pdf [file msb0011-0802-sd2.pdf]

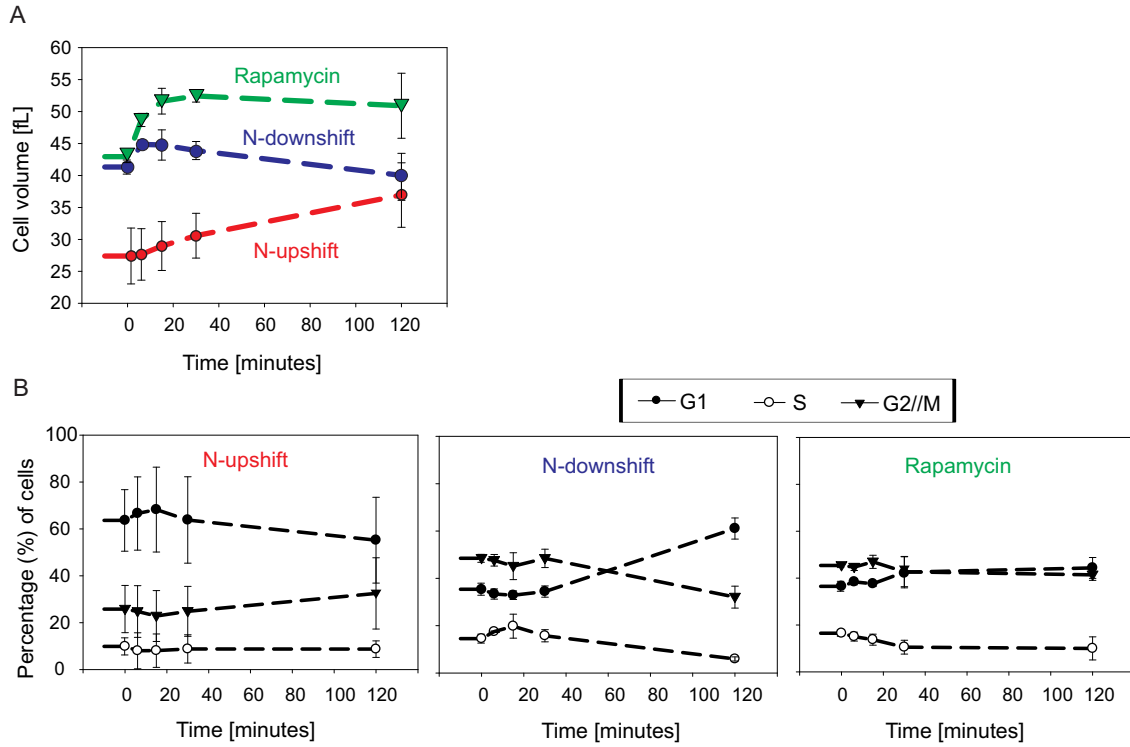

**Supplementary Figure 2. Cell volume and DNA content in the three shifts.** Samples were taken at steady-state (around 10 minutes before the shift), and after 6, 15, 30 and 120 minutes of the shift, and every point was sampled in three independent biological triplicates ( $N=3$ ) and measured for **(A)** cell volume and **(B)** DNA content as described in **Supplementary Table 4**. Values represent the mean  $\pm$  s.d. of three biological independent experiments.
