# Supplementary material for: Inferring causal metabolic signals that regulate the dynamic TORC1-dependent transcriptome
Source: PubMed Central journal article supplement (PMC4422559; doi:10.15252/msb.20145475), 2015-04-17
Supplement: msb0011-0802-sd4.pdf [file msb0011-0802-sd4.pdf]

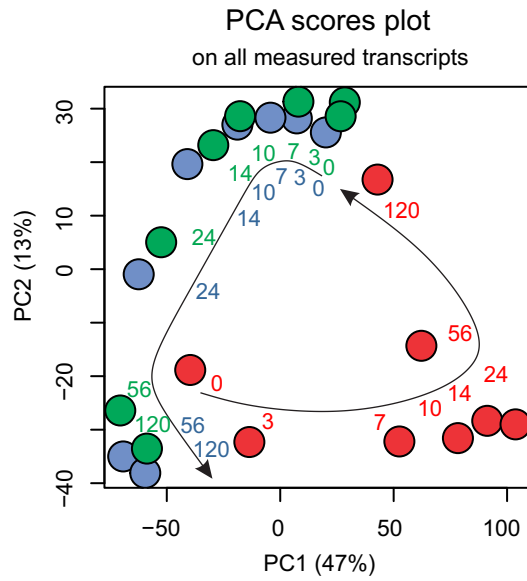

**Supplementary Figure 4. PCA on all measured transcripts.** Scores plot of the first two principal components (PC1, 2) applied to all genes from all time-point samples across the three shift experiments (red: N-upshift; blue: N-downshift; green: rapamycin-induced downshift). In parenthesis is the variance captured by the principal component.
